# Supplementary material
Source: publisher figshare collection journal article supplement (https://tandf.figshare.com/ndownloader/files/12270392)
Supplement: Supplementary file 1 [file 12270392]

**Electronic Supporting Information**

Application of Ni(II) complexes of air stable Schiff base functionalized N‑heterocyclic carbene ligands as catalysts for the transfer hydrogenation of aliphatic ketones

SAMAILA ABUBAKAR and MUHAMMAD D. BALA*


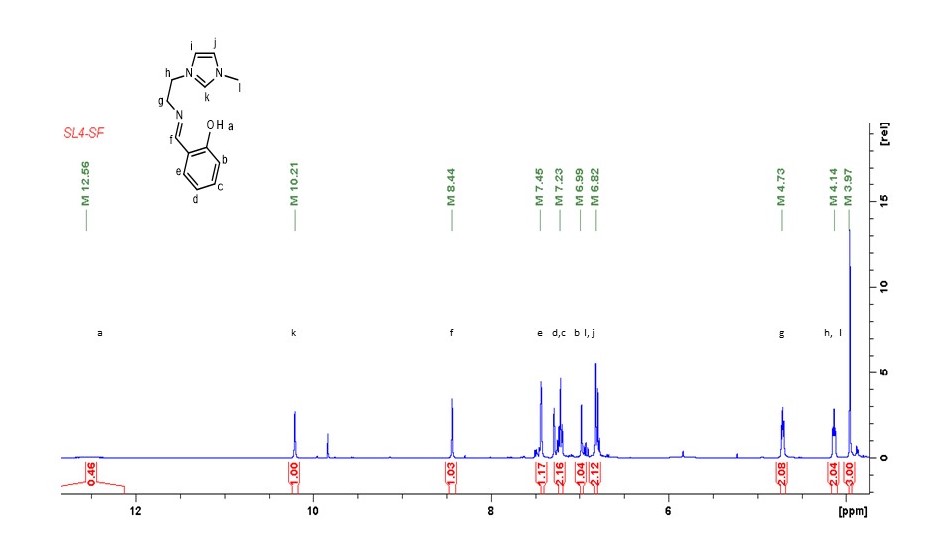


Figure S1. 1H NMR Spectrum of compound **2** in CDCl3.


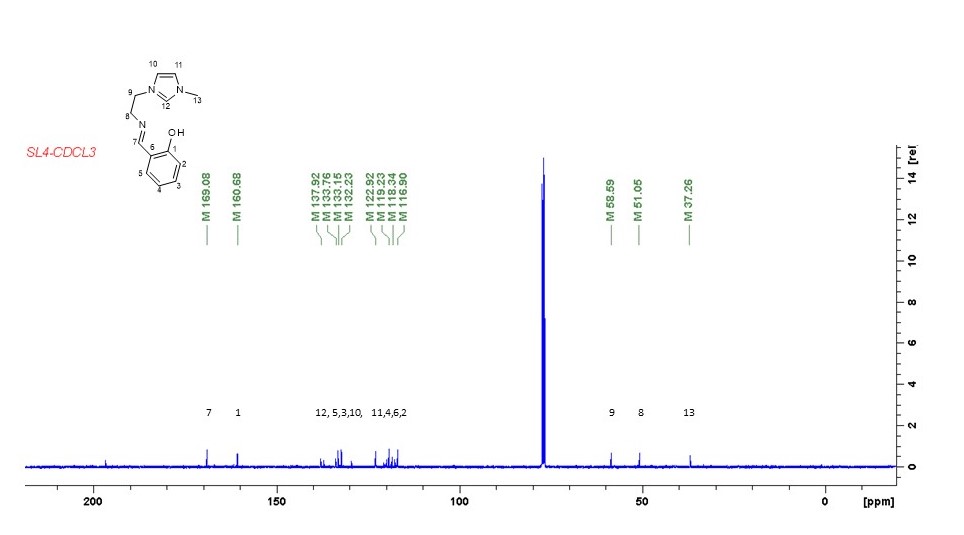


Figure S2. 13C NMR Spectrum of compound **2** in CDCl3.


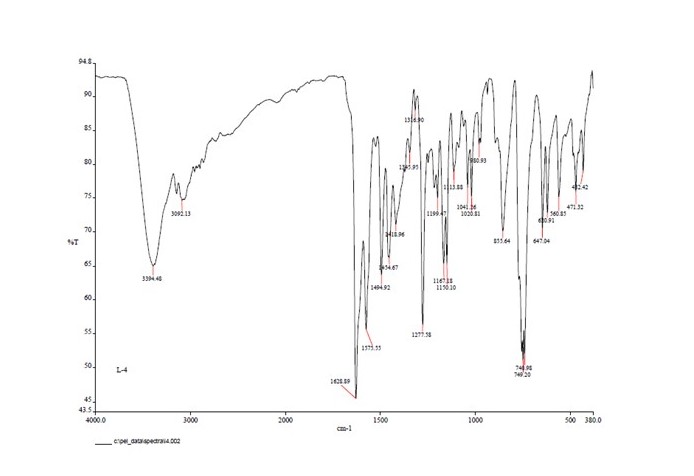


Figure S3. IR Spectrum of **2**.


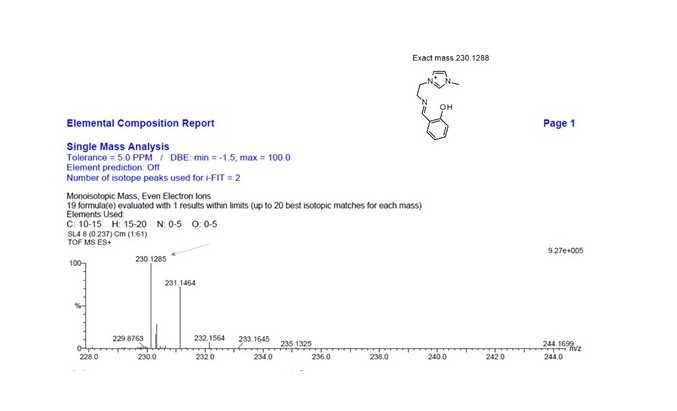


Figure S4. TOF MS ES+ of **2**.


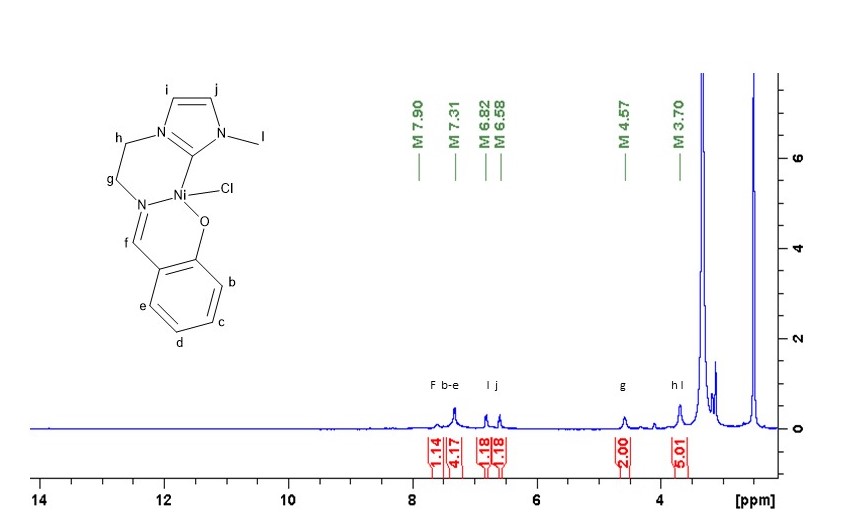


Figure S5. 1H NMR Spectrum of **5** in DMSO-d6.


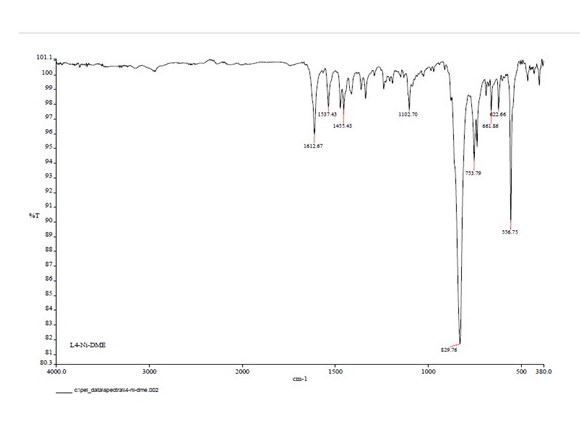


Figure S6. 1H IR Spectrum of **5**.


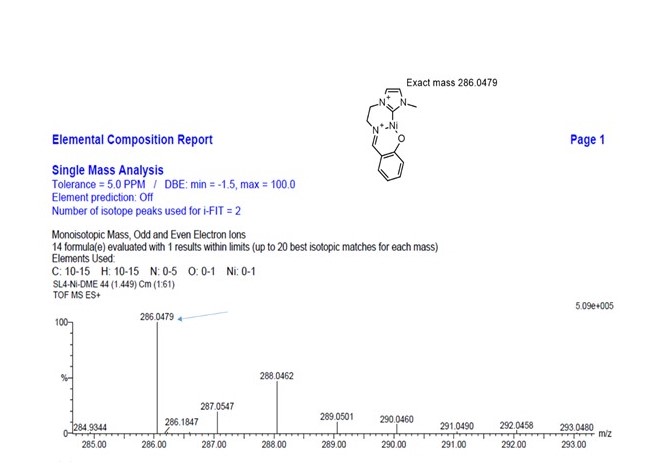


Figure S7. TOF MS ES+ of **5**.


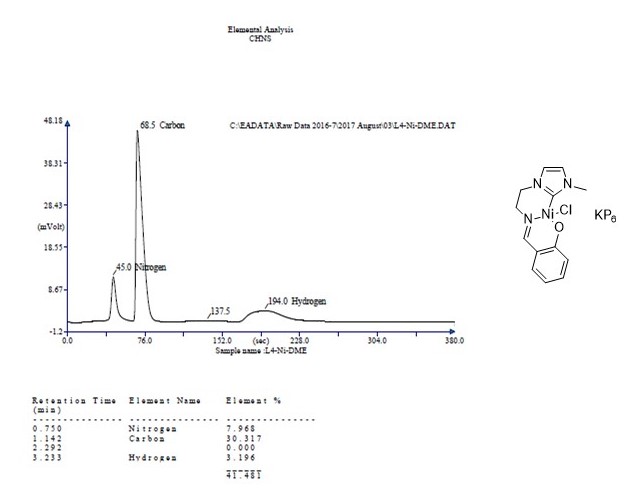


Figure S8. Elemental analysis of **5**.


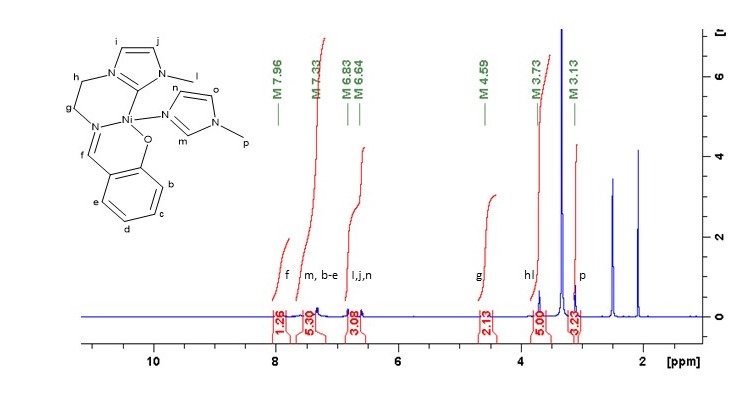


Figure S9. 1H NMR spectrum of **6** in DMSO-d6.


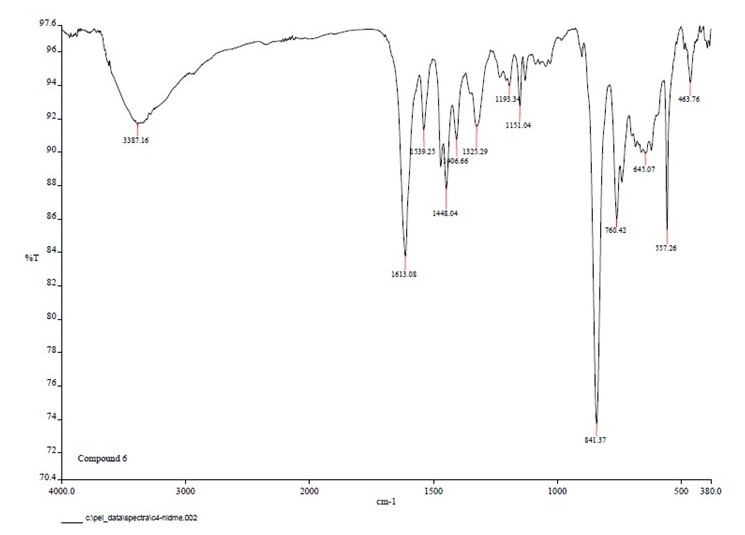


Figure 10. IR Spectrum of **6**.


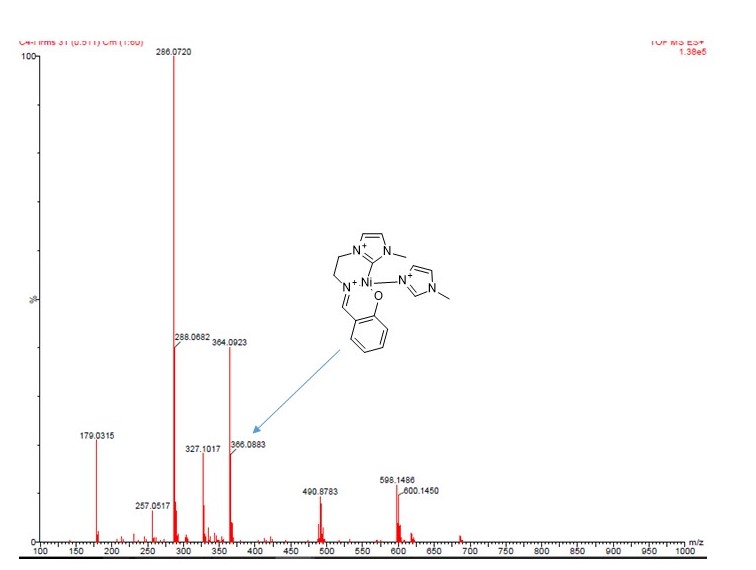


Figure S11. TOF MS ES+ of **6**.


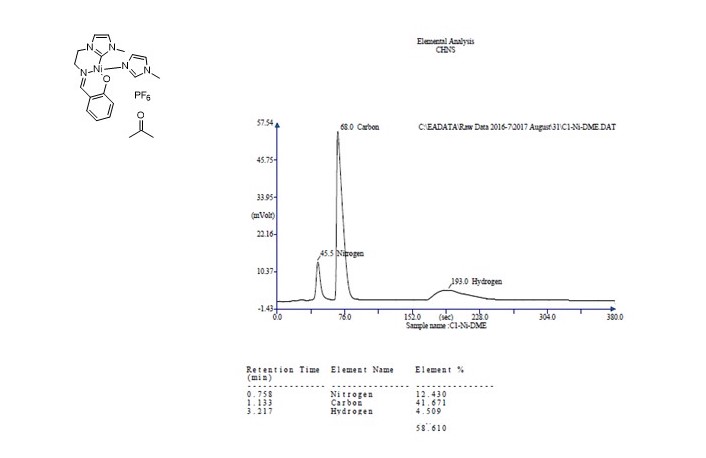


Figure S12. Elemental analysis results of **6**.


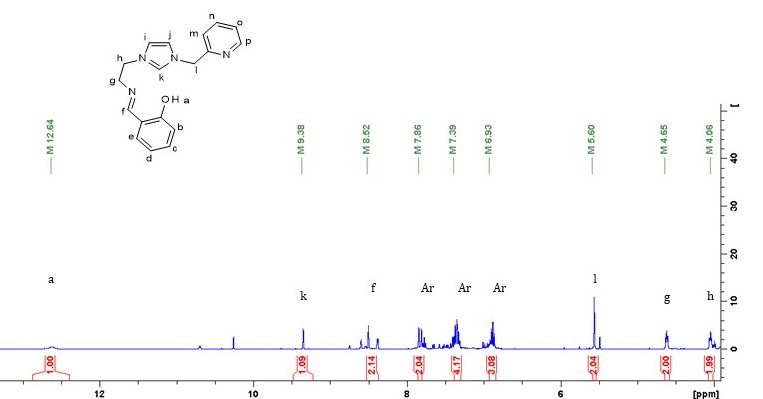


Figure S13. 1H NMR Spectrum of **3** in DMSO-d6.


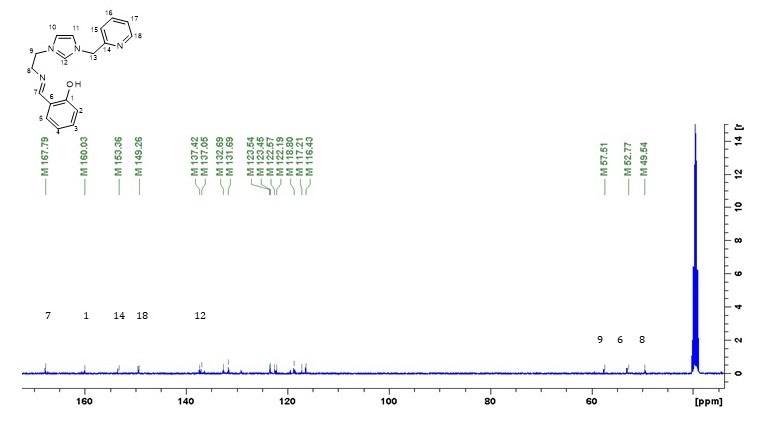


Figure S14. 13C NMR Spectrum of **3** in DMSO-d6.


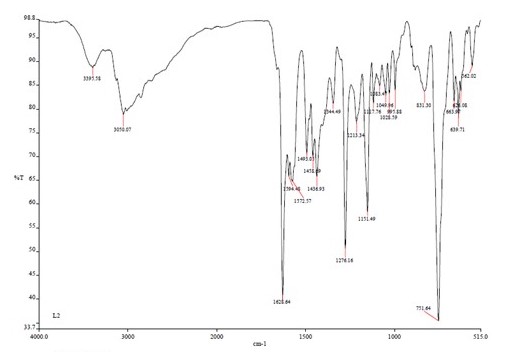


Figure S15. IR Spectrum of **3**.


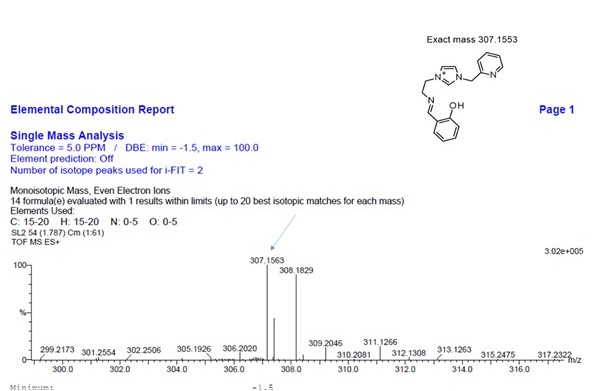


Figure S16. TOF MS ES+ of **3**.


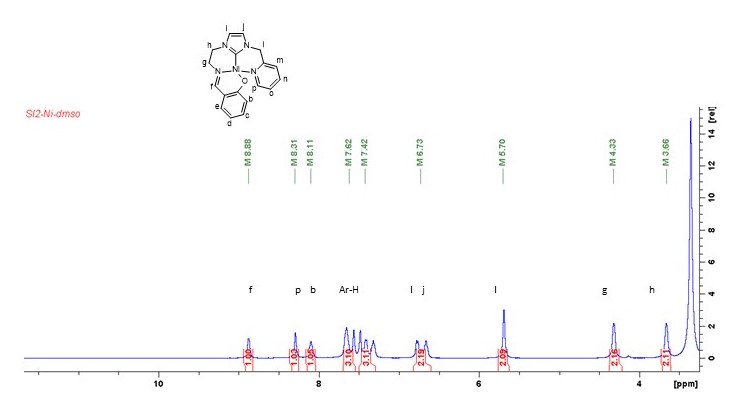


Figure S17. 1H NMR Spectrum of **4** in DMSO-d6.


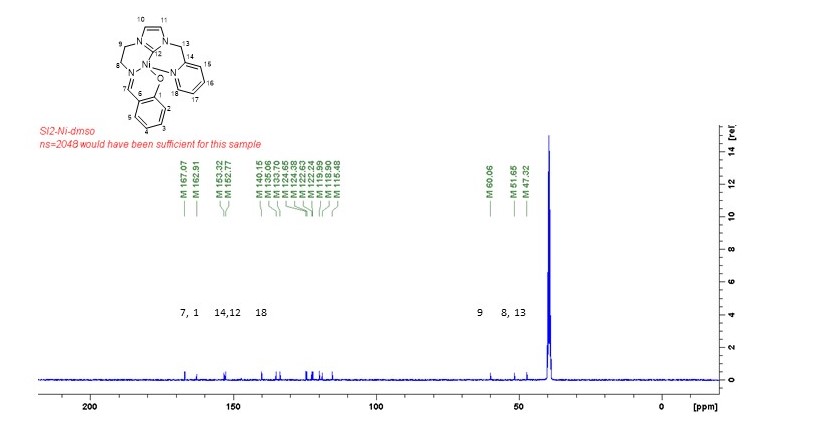


Figure S18. 13C NMR Spectrum of **4** in DMSO-d6.


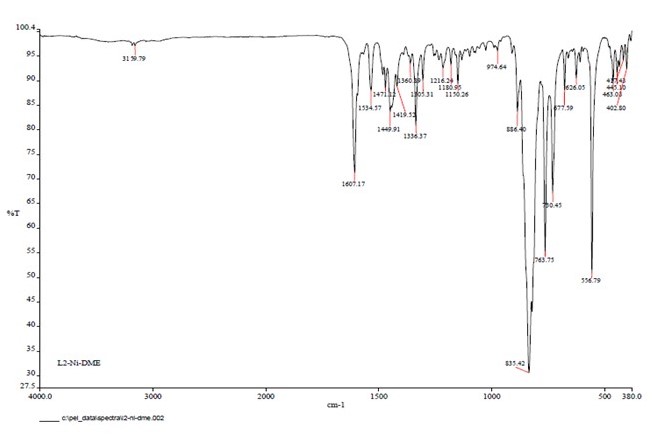


Figure S19. ATR IR Spectrum of **4**.


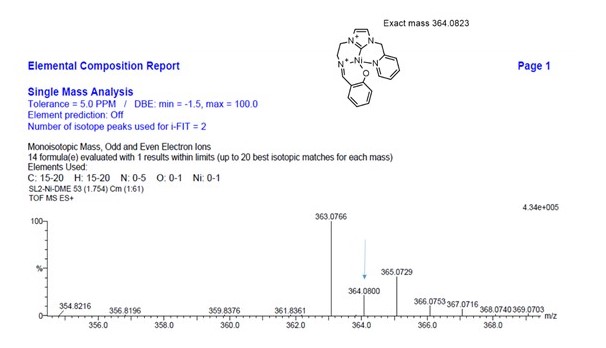


Figure S20. TOF MS ES+ of **4**.


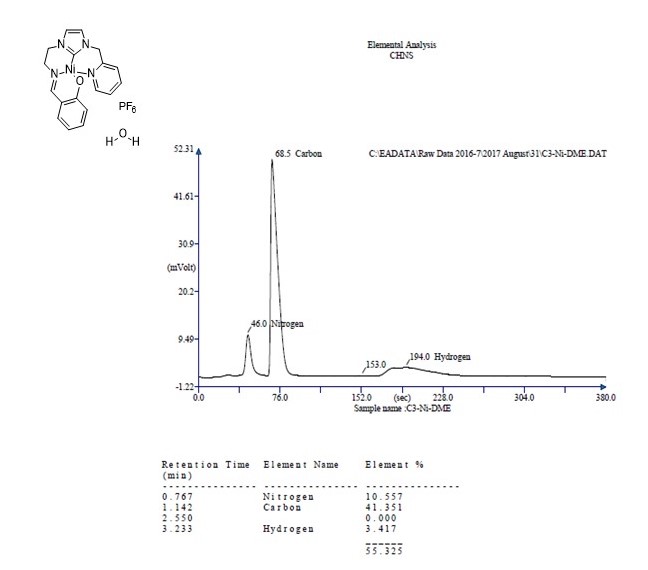


Figure S21. Elemental analysis results of **4**.
